# Supplementary material for: Exposure to Cigarette Smoke Augments Post-ischemic Brain Injury and Inflammation via Mobilization of Neutrophils and Monocytes
Source: PubMed Central journal article supplement (PMC6853894; doi:10.3389/fimmu.2019.02576), 2019-11-07
Supplement: Data_Sheet_1.pdf [file Data_Sheet_1.pdf]

## Supplemental Materials

**Table 1. Blood gas parameters and physiological variables.**

|                          | Control   | Cigarette smoke |
|--------------------------|-----------|-----------------|
| pH units                 | 7.35±0.09 | 7.42±0.02       |
| PCO <sub>2</sub> , mm Hg | 37.5±2.2  | 32.3±2.1        |
| PO <sub>2</sub> , mm Hg  | 101.7±1.8 | 102.8±3.4       |
| K <sup>+</sup> , mmol/l  | 4.11±0.2  | 4.03±0.1        |
| Glucose, mmol/l          | 12.4±1.1  | 12.3±0.6        |
| Rectal temperature, °C   | 36.8±0.2  | 37.0±0.2        |

Blood gas parameters and physiological variables were measured in mice receiving 4 days exposure to cigarette smoke or normal air. n=8 per group. Mean ± SD.

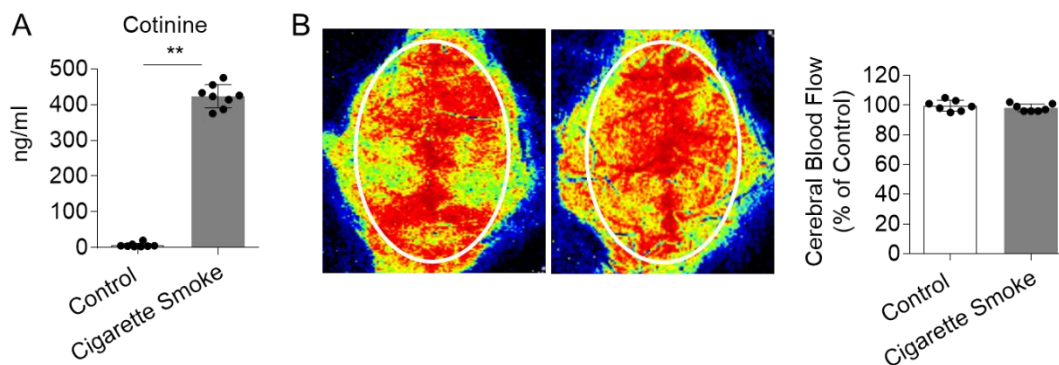

**Supplementary Figure 1. Cotinine levels and cerebral blood flow after smoke exposure.**

**A.** Circulating cotinine levels were measured in mice receiving 4 days exposure to cigarette smoke or normal air. n=8 per group. Mean ± SD. \*\*P < 0.01. **B. Left:** images of cerebral blood flow (CBF) before MCAO surgery in normal air exposure and smoke exposure group. **Right:** Quantification of CBF. Results show normalized cerebral blood flow. n=7 mice per group. Mean ± SD.

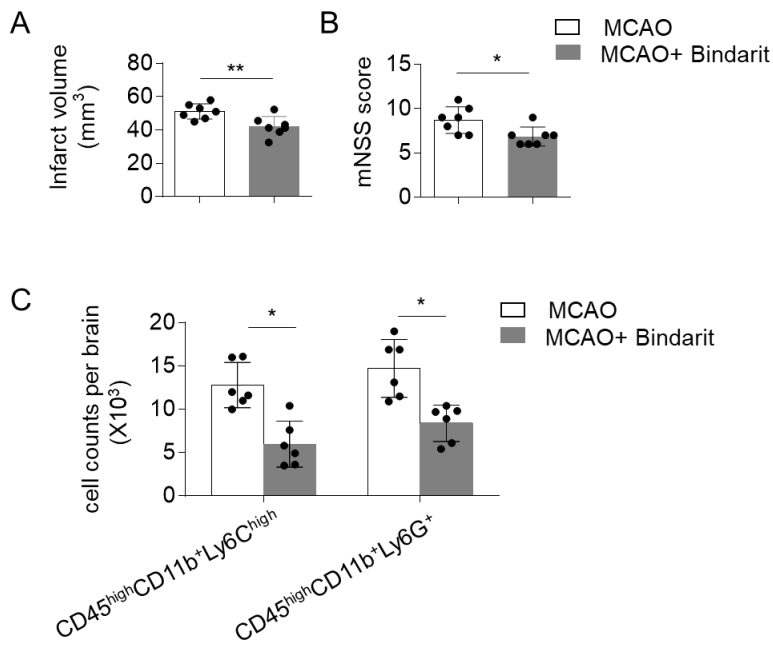

**Supplementary Figure 2.** Bindarit treatment reduced neurodeficits and infarct volume after MCAO. Mice received 4 consecutive days of bindarit (50 mg/kg, orally twice daily) or equal volume of vehicle before MCAO. At day 1 post-MCAO, neurodeficits and brain infarct volume were assessed. **A-B.** Summarized bar graph shows infarct volume and modified Neurological Severity Score (mNSS) of mice receiving bindarit or vehicle. n = 7 per group. \*P<0.05, \*\*P< 0.01. **C.** Quantification of cell counts of neutrophils (CD45<sup>high</sup>CD11b<sup>+</sup>Ly6G<sup>+</sup>) and pro-inflammatory monocytes (CD45<sup>high</sup>CD11b<sup>+</sup>Ly6C<sup>high</sup>) in the brain of mice receiving bindarit or vehicle. n=6 per group. \*P < 0.05. Mean ± SD.

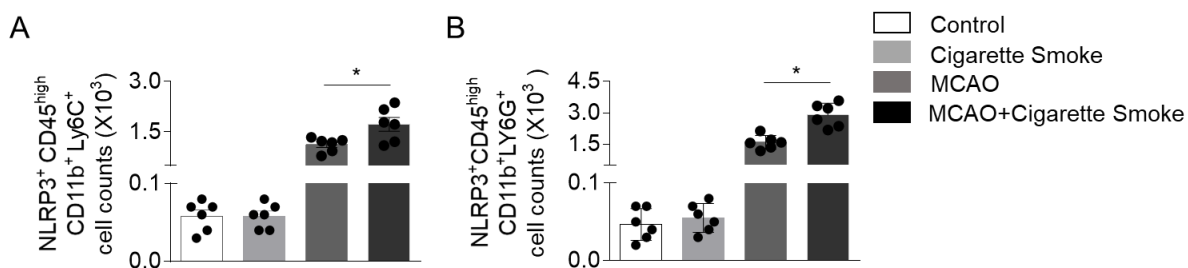

**Supplementary Figure 3.** Cigarette smoke increased cell counts of brain-infiltrating neutrophils and monocytes that express NLRP3 after MCAO. Brain samples were harvested for flow cytometry analysis from groups of mice receiving 4 consecutive days for exposure to cigarette smoke or normal air prior to

MCAO surgery or post MCAO surgery under 4 days cigarette exposure. **A-B**. Bar graph shows the quantification of cell counts of NLRP3<sup>+</sup> monocytes (CD45<sup>high</sup>CD11b<sup>+</sup>Ly6C<sup>+</sup>) and NLRP3<sup>+</sup> neutrophils (CD45<sup>high</sup> CD11b<sup>+</sup>Ly6G<sup>+</sup>) in the brain tissue at day1 after MCAO. n=6 per group. \*P < 0.05, Mean ± SD.

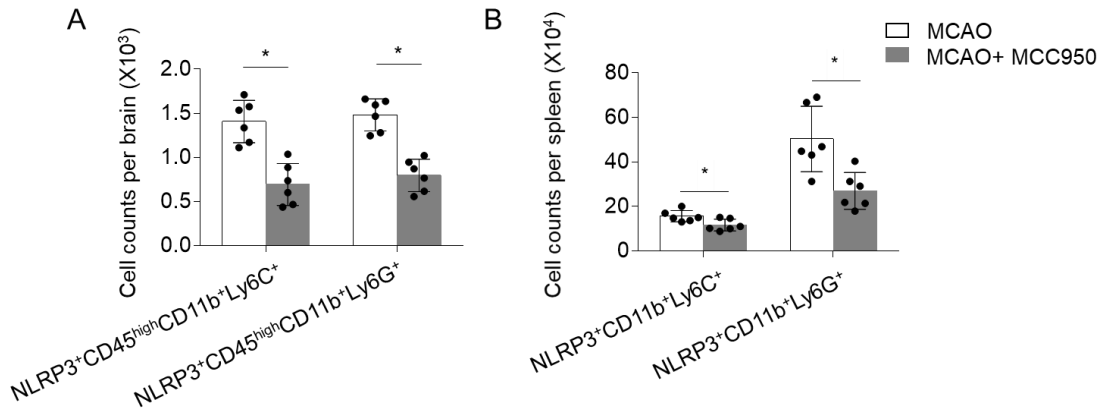

**Supplementary Figure 4.** MCC950 treatment decreased neutrophil and monocytes that express NLRP3 in the brain and spleen after MCAO. Mice was treated with 4 consecutive days of MCC950 (10 mg/kg, i.p.) or equal volume of vehicle before MCAO. At day 1 after MCAO, brain and spleen samples were harvested for flow cytometry analysis. **A-B**. Quantification of cell counts of neutrophils (CD45<sup>high</sup> CD11b<sup>+</sup>Ly6G<sup>+</sup>) and monocytes (CD45<sup>high</sup>CD11b<sup>+</sup>Ly6C<sup>+</sup>) that express NLRP3 in the brain (A) and spleen (B). n=6 per group. \*P < 0.05. Mean ± SD.
